# Supplementary material
Source: publisher figshare collection journal article supplement (https://tandf.figshare.com/ndownloader/files/5149039)
Supplement: Supplementary file 1 [file 5149039]

**Online Appendix**

**Figure A1: Proportions of bus commuters by income level by sex and race in small- and medium-sized cities.**

**Figure A2 Proportions of Bus Commuters by Income Level by Sex and Race in the 22 Large Cities**

**Figure A3 Proportions of Bus Commuters by Income Level by Sex and Race in the 8 Largest Cities with Substantial Subway Services**

**Figure A4 Proportions of Subway Commuters by Income Level by Sex and Race in the 8 Largest Cities with Substantial Subway Services**

**Figure A5 Proportions of Walkers to Workplaces by Income Level by Sex and Race in Small and Medium-Sized Cities**

**Figure A6 Proportions of Walkers to Workplaces by Income Level by Sex and Race in the 22 Large Cities**

**Figure A7 Proportions of Walkers to Workplaces by Income Level by Sex and Race in the 8 Largest Cities**
